# Supplementary material
Source: PubMed Central journal article supplement (PMC6061468)
Supplement: TX-005-C6TX00193A-s001.pdf [file TX-005-C6TX00193A-s001.pdf]

Supplement data

Suppl. Table 1 The effect of PTU and AP on serum  $tT_3$  and  $tT_4$  in ovariectomized rats

| Group             | n     | Serum $tT_3$ | Serum $tT_4$           |                          |
|-------------------|-------|--------------|------------------------|--------------------------|
| OVX CTL.          | 10    | 0.87±0.15    | 80.29±25.71            |                          |
| PTU<br>(mg/kg•bw) | 0.1   | 10           | 0.66±0.11 <sup>a</sup> | 55.09±6.64 <sup>a</sup>  |
|                   | 0.5   | 10           | 0.51±0.10 <sup>a</sup> | 47.07±9.33 <sup>a</sup>  |
|                   | 1.0   | 10           | 0.31±0.07 <sup>a</sup> | 42.62±14.34 <sup>a</sup> |
|                   | 5.0   | 10           | 0.31±0.08 <sup>a</sup> | 31.26±12.29 <sup>a</sup> |
| AP<br>(mg/kg•bw)  | 50.0  | 10           | 0.69±0.14 <sup>a</sup> | 62.11±16.78              |
|                   | 100.0 | 10           | 0.69±0.23 <sup>a</sup> | 40.88±11.19 <sup>a</sup> |
|                   | 250.0 | 10           | 0.58±0.14 <sup>a</sup> | 33.44±15.60 <sup>a</sup> |
|                   | 500.0 | 8            | 0.54±0.19 <sup>a</sup> | 29.35±8.77 <sup>a</sup>  |

Note: all statistical significant difference was indicated by a:  $P < 0.05$  compared with OVX control.

Suppl. Table 2 Goodness of fit test results of benchmark modeling for individual endpoints of PTU treated OVX rats (Confidence level=0.95, BMRF= 0.05)

| Model name  | $T_3$    |      | $T_4$             |     | TSH               |       | Thyroid follicular/colloid |     | Thyroid organ/body weight |      |
|-------------|----------|------|-------------------|-----|-------------------|-------|----------------------------|-----|---------------------------|------|
|             | <i>P</i> | AIC  | <i>P</i>          | AIC | <i>P</i>          | AIC   | <i>P</i>                   | AIC | <i>P</i>                  | AIC  |
| Exponential | <0.001   | -67  | <0.001            | 356 | 0.37 <sup>a</sup> | 264.1 | 0.09                       | -46 | 0.25 <sup>a</sup>         | 94.5 |
| Hill        | 0.02     | -123 | 0.27 <sup>a</sup> | 316 | 0.37 <sup>a</sup> | 264.0 | 0.06                       | -45 | 0.27 <sup>a</sup>         | 94.4 |
| Linear      | 0.01     | -120 | <0.001            | 335 | <0.01             | 286   | <0.001                     | -12 | <0.001                    | 101  |
| Poower      | 0.01     | -120 | <0.001            | 335 | <0.01             | 286   | <0.001                     | -12 | <0.001                    | 101  |

“N/A” indicates there was no result gained; “a” indicates models with statistical significance:  $P > 0.05$ .

Suppl. Table 3. BMD and BMDL values for suitable endpoints of PTU treated OVX rats.

| Endpoints | BMD (mg/kg bw) | BMDL (mg/kg bw) |
|-----------|----------------|-----------------|
|-----------|----------------|-----------------|

|                           |      |      |
|---------------------------|------|------|
| tT <sub>4</sub> (Hill)    | 0.06 | 0.02 |
| TSH (Power)               | 0.12 | 0.08 |
| Thyroid organ/body weight | 0.13 | 0.09 |

Suppl. Table 4 Goodness of fit test results of benchmark modeling for individual endpoints of AP treated OVX rats (Confidence level=0.95, BMRF= 0.05)

| Model name  | T <sub>4</sub>    |     | TSH               |       | Thyroid follicular/colloid |     |
|-------------|-------------------|-----|-------------------|-------|----------------------------|-----|
|             | <i>P</i>          | AIC | <i>P</i>          | AIC   | <i>P</i>                   | AIC |
| Exponential | <0.001            | 367 | 0.56 <sup>a</sup> | 354.2 | 0.69 <sup>a</sup>          | -22 |
| Hill        | 0.67 <sup>a</sup> | 325 | 0.66 <sup>a</sup> | 354.1 | 0.98 <sup>a</sup>          | -23 |
| Linear      | <0.001            | 340 | <0.001            | 367   | <0.001                     | -3  |
| Poower      | <0.001            | 340 | <0.001            | 367   | <0.001                     | -3  |

“N/A” indicates there was no result gained; “a” indicates models with statistical significance:  $P > 0.05$ .

Suppl. Table 5. BMD and BMDL values for suitable endpoints of AP treated OVX rats.

| Endpoints                  | BMD (mg/kg bw) | BMDL (mg/kg bw) |
|----------------------------|----------------|-----------------|
| tT <sub>4</sub> (Hill)     | 46             | 28              |
| TSH (Power)                | 38             | 16              |
| Thyroid follicular/colloid | 22             | 15              |
